# Supplementary material for: Engineered live bacteria suppress Pseudomonas aeruginosa infection in mouse lung and dissolve endotracheal-tube biofilms
Source: PubMed Central journal article supplement (PMC10421741; doi:10.1038/s41587-022-01584-9), 2023-01-19
Supplement: 41587_2022_1584_MOESM1_ESM.pdf [file 41587_2022_1584_MOESM1_ESM.pdf]

# Engineered live bacteria suppress *Pseudomonas aeruginosa* infection in mouse lung and dissolve endotracheal-tube biofilms

---

In the format provided by the authors and unedited

**SUPPLEMENTARY TABLES:**

**Supplementary Table 1.** Histopathologic evaluation of the lung lobes (left, right cranial and right medium) of mice inoculated with  $1 \times 10^7$  CFU of the WT or CV2 *M. pneumoniae* strains or with PBS at 2, 14 or 45 days post-infection (dpi). Data represent the average and the SD of the evaluations from five mice per group. The scoring system is detailed in the Methods section.

| Time post-infection | Group |         | Peribronchiolar/bronchial infiltrate (%) |     |     | Quality of peribronchiolar/bronchial infiltrates |     |     | Bronchiolar/bronchial luminal exudate |     |     | Perivascular infiltrate (%) |     |     | Parenchymal pneumonia |     |     | Total score (0-26) |     |      |
|---------------------|-------|---------|------------------------------------------|-----|-----|--------------------------------------------------|-----|-----|---------------------------------------|-----|-----|-----------------------------|-----|-----|-----------------------|-----|-----|--------------------|-----|------|
|                     |       |         | Left                                     | RCr | RM  | Left                                             | RCr | RM  | Left                                  | RCr | RM  | Left                        | RCr | RM  | Left                  | RCr | RM  | Left               | RCr | RM   |
| 2 dpi               | PBS   | Average | 0.0                                      | 0.0 | 0.0 | 0.0                                              | 0.0 | 0.0 | 0.0                                   | 0.0 | 0.0 | 0.2                         | 0.2 | 0.0 | 0.0                   | 0.0 | 0.0 | 0.2                | 0.2 | 0.0  |
|                     |       | SD      | 0.0                                      | 0.0 | 0.0 | 0.0                                              | 0.0 | 0.0 | 0.0                                   | 0.0 | 0.0 | 0.4                         | 0.4 | 0.0 | 0.0                   | 0.0 | 0.0 | 0.4                | 0.4 | 0.0  |
|                     | WT    | Average | 0.8                                      | 0.4 | 1.0 | 0.8                                              | 0.4 | 1.0 | 2.0                                   | 1.2 | 1.6 | 1.8                         | 1.8 | 1.6 | 2.2                   | 2.8 | 3.0 | 13.2               | 9.8 | 13.4 |
|                     |       | SD      | 0.4                                      | 0.5 | 0.0 | 0.4                                              | 0.5 | 0.0 | 0.0                                   | 1.0 | 0.8 | 0.4                         | 0.4 | 0.5 | 1.9                   | 1.6 | 0.0 | 2.1                | 4.5 | 2.7  |
|                     | CV2   | Average | 0.8                                      | 0.2 | 0.4 | 0.8                                              | 0.2 | 0.4 | 0.8                                   | 0.8 | 0.4 | 1.6                         | 1.0 | 1.4 | 0.6                   | 1.2 | 0.0 | 7.8                | 5.4 | 4.2  |
|                     |       | SD      | 0.4                                      | 0.4 | 0.5 | 0.4                                              | 0.4 | 0.5 | 1.0                                   | 1.0 | 0.8 | 0.5                         | 0.0 | 0.5 | 1.2                   | 1.5 | 0.0 | 4.0                | 3.0 | 3.9  |
| 14 dpi              | PBS   | Average | 0.0                                      | 0.0 | 0.0 | 0.0                                              | 0.0 | 0.0 | 0.0                                   | 0.0 | 0.0 | 0.2                         | 0.2 | 0.0 | 0.0                   | 0.0 | 0.0 | 0.2                | 0.2 | 0.0  |
|                     |       | SD      | 0.0                                      | 0.0 | 0.0 | 0.0                                              | 0.0 | 0.0 | 0.0                                   | 0.0 | 0.0 | 0.4                         | 0.4 | 0.0 | 0.0                   | 0.0 | 0.0 | 0.4                | 0.4 | 0.0  |
|                     | WT    | Average | 0.8                                      | 0.4 | 1.0 | 0.8                                              | 0.8 | 0.8 | 2.0                                   | 1.2 | 1.6 | 1.8                         | 1.8 | 1.6 | 2.2                   | 2.8 | 3.0 | 13.2               | 9.8 | 13.4 |
|                     |       | SD      | 0.4                                      | 0.5 | 0.0 | 0.4                                              | 0.4 | 0.4 | 0.0                                   | 1.0 | 0.8 | 0.4                         | 0.4 | 0.5 | 1.9                   | 1.6 | 0.0 | 2.1                | 4.5 | 2.7  |
|                     | CV2   | Average | 0.8                                      | 0.2 | 0.4 | 0.0                                              | 0.0 | 0.0 | 0.8                                   | 0.8 | 0.4 | 1.6                         | 1.0 | 1.4 | 0.6                   | 1.2 | 0.0 | 7.8                | 5.4 | 4.2  |
|                     |       | SD      | 0.4                                      | 0.4 | 0.5 | 0.0                                              | 0.0 | 0.0 | 1.0                                   | 1.0 | 0.8 | 0.5                         | 0.0 | 0.5 | 1.2                   | 1.5 | 0.0 | 4.0                | 3.0 | 3.9  |
| 45 dpi              | PBS   | Average | 0.0                                      | 0.0 | 0.0 | 0.0                                              | 0.0 | 0.0 | 0.0                                   | 0.0 | 0.0 | 0.2                         | 0.2 | 0.0 | 0.0                   | 0.0 | 0.0 | 0.2                | 0.2 | 0.0  |
|                     |       | SD      | 0.0                                      | 0.0 | 0.0 | 0.0                                              | 0.0 | 0.0 | 0.0                                   | 0.0 | 0.0 | 0.4                         | 0.4 | 0.0 | 0.0                   | 0.0 | 0.0 | 0.4                | 0.4 | 0.0  |
|                     | WT    | Average | 0.8                                      | 0.4 | 1.0 | 0.0                                              | 0.0 | 0.0 | 2.0                                   | 1.2 | 1.6 | 1.8                         | 1.8 | 1.6 | 2.2                   | 2.8 | 3.0 | 13.2               | 9.8 | 13.4 |
|                     |       | SD      | 0.4                                      | 0.5 | 0.0 | 0.0                                              | 0.0 | 0.0 | 0.0                                   | 1.0 | 0.8 | 0.4                         | 0.4 | 0.5 | 1.9                   | 1.6 | 0.0 | 2.1                | 4.5 | 2.7  |
|                     | CV2   | Average | 0.8                                      | 0.2 | 0.4 | 0.0                                              | 0.0 | 0.0 | 0.8                                   | 0.8 | 0.4 | 1.6                         | 1.0 | 1.4 | 0.6                   | 1.2 | 0.0 | 7.8                | 5.4 | 4.2  |
|                     |       | SD      | 0.4                                      | 0.4 | 0.5 | 0.0                                              | 0.0 | 0.0 | 1.0                                   | 1.0 | 0.8 | 0.5                         | 0.0 | 0.5 | 1.2                   | 1.5 | 0.0 | 4.0                | 3.0 | 3.9  |

**Supplementary Table 2.** Gene expression of cytokines analyzed in lungs of mice inoculated with WT or CV2 *M. pneumoniae* or with PBS. Analysis was performed in three major lung lobes (RCr, right cranial; RM, right middle; and L, left). Values are presented as mean  $\pm$  SD; n = 5 mice per group.

| Gene         | Group | 2 dpi         |                |               | 14 dpi        |               |               | 45 dpi        |                |               |
|--------------|-------|---------------|----------------|---------------|---------------|---------------|---------------|---------------|----------------|---------------|
|              |       | RCr           | RM             | L             | RCr           | RM            | L             | RCr           | RM             | L             |
| <i>tnf</i>   | PBS   | 1 $\pm$ 1.2   | 1 $\pm$ 0.4    | 1 $\pm$ 0.9   | 1 $\pm$ 1.0   | 1 $\pm$ 1.0   | 1 $\pm$ 0.8   | 1 $\pm$ 0.7   | 1 $\pm$ 0.8    | 1 $\pm$ 0.0   |
|              | WT    | 2.8 $\pm$ 2.4 | 3.1 $\pm$ 2.4  | 3.3 $\pm$ 0.2 | 3.4 $\pm$ 2.5 | 1.9 $\pm$ 0.2 | 2.2 $\pm$ 0.0 | 1.4 $\pm$ 0.5 | 2.11 $\pm$ 1.6 | 2.2 $\pm$ 1.4 |
|              | CV2   | 1.1 $\pm$ 0.3 | 1.8 $\pm$ 0.6  | 1.5 $\pm$ 0.8 | 0.5 $\pm$ 0.4 | 0.4 $\pm$ 0.7 | 0.4 $\pm$ 0.1 | 1.2 $\pm$ 0.4 | 1.7 $\pm$ 0.3  | 1.9 $\pm$ 0.3 |
| <i>cxcl1</i> | PBS   | 1 $\pm$ 0.3   | 1 $\pm$ 0.3    | 1 $\pm$ 0.9   | 1 $\pm$ 0.5   | 1 $\pm$ 0.4   | 1 $\pm$ 0.6   | 1 $\pm$ 0.2   | 1 $\pm$ 0.3    | 1 $\pm$ 0.8   |
|              | WT    | 3.8 $\pm$ 1.6 | 3.5 $\pm$ 1.8  | 4.4 $\pm$ 0.1 | 0.8 $\pm$ 0.6 | 0.7 $\pm$ 0.2 | 0.1 $\pm$ 0.0 | 1.2 $\pm$ 0.6 | 1.2 $\pm$ 0.8  | 1.9 $\pm$ 0.0 |
|              | CV2   | 1.3 $\pm$ 0.7 | 0.94 $\pm$ 0.4 | 1.3 $\pm$ 0.7 | 0.4 $\pm$ 0.4 | 0.3 $\pm$ 0.1 | 0.2 $\pm$ 0.1 | 0.7 $\pm$ 0.3 | 0.7 $\pm$ 0.6  | 0.9 $\pm$ 0.2 |
| <i>ccl3</i>  | PBS   | 1 $\pm$ 0.3   | 1 $\pm$ 0.5    | 1 $\pm$ 0.6   | 1 $\pm$ 0.4   | 1 $\pm$ 0.7   | 1 $\pm$ 0.5   | 1 $\pm$ 0.6   | 1 $\pm$ 0.7    | 1 $\pm$ 0.5   |
|              | WT    | 4.0 $\pm$ 0.7 | 3.2 $\pm$ 2.4  | 4.4 $\pm$ 0.1 | 2.7 $\pm$ 1.3 | 1.6 $\pm$ 0.4 | 1 $\pm$ 0.0   | 0.7 $\pm$ 0.7 | 1.5 $\pm$ 0.8  | 1 $\pm$ 0.5   |
|              | CV2   | 1.9 $\pm$ 0.1 | 1.2 $\pm$ 0.5  | 2.2 $\pm$ 0.8 | 1.5 $\pm$ 0.6 | 1.5 $\pm$ 1.4 | 1.7 $\pm$ 0.4 | 0.8 $\pm$ 0.5 | 1.0 $\pm$ 0.4  | 1.6 $\pm$ 0.2 |
| <i>ccl2</i>  | PBS   | 1 $\pm$ 0.3   | 1 $\pm$ 0.2    | 1 $\pm$ 0.5   | 1 $\pm$ 0.5   | 1 $\pm$ 0.4   | 1 $\pm$ 0.5   | 1 $\pm$ 0.4   | 1 $\pm$ 0.3    | 1 $\pm$ 0.0   |
|              | WT    | 3.8 $\pm$ 0.7 | 2.8 $\pm$ 1.1  | 2.4 $\pm$ 0.3 | 2.4 $\pm$ 1.3 | 1.9 $\pm$ 0.5 | 2.2 $\pm$ 0.0 | 2.3 $\pm$ 3.4 | 1.3 $\pm$ 0.4  | 1.5 $\pm$ 0.9 |
|              | CV2   | 1.4 $\pm$ 0.3 | 0.8 $\pm$ 0.2  | 0.9 $\pm$ 0.6 | 1.1 $\pm$ 0.2 | 1.3 $\pm$ 0.7 | 1.8 $\pm$ 0.3 | 0.8 $\pm$ 0.5 | 0.6 $\pm$ 1.1  | 1.3 $\pm$ 0.6 |
| <i>ifng</i>  | PBS   | 1 $\pm$ 0.3   | 1 $\pm$ 0.6    | 1 $\pm$ 0.6   | 1 $\pm$ 0.6   | 1 $\pm$ 0.6   | 1 $\pm$ 0.1   | 1 $\pm$ 0.1   | 1 $\pm$ 0.6    | 1 $\pm$ 0.5   |
|              | WT    | 4.5 $\pm$ 2.2 | 5.8 $\pm$ 3.4  | 5.7 $\pm$ 3.0 | 2.6 $\pm$ 1.4 | 1.1 $\pm$ 0.9 | 0.6 $\pm$ 0.0 | 1.7 $\pm$ 0.5 | 2.54 $\pm$ 1.2 | 1.8 $\pm$ 0.6 |
|              | CV2   | 1.0 $\pm$ 0.5 | 0.5 $\pm$ 0.1  | 1.3 $\pm$ 0.6 | 1.1 $\pm$ 0.7 | 0.9 $\pm$ 0.6 | 0.7 $\pm$ 0.1 | 2.0 $\pm$ 0.7 | 1.45 $\pm$ 1.7 | 1.7 $\pm$ 1.7 |
| <i>il1b</i>  | PBS   | 1 $\pm$ 0.5   | 1 $\pm$ 0.3    | 1 $\pm$ 0.7   | 1 $\pm$ 0.4   | 1 $\pm$ 0.4   | 1 $\pm$ 0.3   | 1 $\pm$ 0.3   | 1 $\pm$ 0.2    | 1 $\pm$ 0.2   |
|              | WT    | 3.3 $\pm$ 1.5 | 2.8 $\pm$ 1.5  | 2.9 $\pm$ 1.7 | 1.4 $\pm$ 0.1 | 1.0 $\pm$ 0.4 | 0.9 $\pm$ 0.0 | 0.9 $\pm$ 0.2 | 1.0 $\pm$ 0.4  | 1.3 $\pm$ 0.1 |
|              | CV2   | 1.6 $\pm$ 0.7 | 1.2 $\pm$ 0.1  | 1.4 $\pm$ 0.9 | 1.1 $\pm$ 0.8 | 0.6 $\pm$ 0.1 | 1.1 $\pm$ 0.4 | 0.7 $\pm$ 0.3 | 0.5 $\pm$ 0.5  | 1.4 $\pm$ 0.9 |
| <i>il6</i>   | PBS   | 1 $\pm$ 0.3   | 1 $\pm$ 0.1    | 1 $\pm$ 0.8   | 1 $\pm$ 0.3   | 1 $\pm$ 0.6   | 1 $\pm$ 0.8   | 1 $\pm$ 0.8   | 1 $\pm$ 0.0    | 1 $\pm$ 0.1   |
|              | WT    | 0.7 $\pm$ 0.5 | 0.4 $\pm$ 0.2  | 0.5 $\pm$ 0.2 | 2.3 $\pm$ 0.7 | 2.1 $\pm$ 0.2 | 1.9 $\pm$ 0.0 | 1.5 $\pm$ 0.3 | 1.1 $\pm$ 0.2  | 0.8 $\pm$ 0.0 |
|              | CV2   | 0.4 $\pm$ 0.1 | 0.8 $\pm$ 0.5  | 0.7 $\pm$ 0.3 | 0.9 $\pm$ 0.3 | 0.9 $\pm$ 0.4 | 1.2 $\pm$ 0.2 | 0.7 $\pm$ 0.2 | 0.5 $\pm$ 0.4  | 1.1 $\pm$ 0.5 |
| <i>il12a</i> | PBS   | 1 $\pm$ 0.3   | 1 $\pm$ 0.3    | 1 $\pm$ 0.5   | 1 $\pm$ 0.5   | 1 $\pm$ 0.5   | 1 $\pm$ 0.3   | 1 $\pm$ 0.3   | 1 $\pm$ 0.4    | 1 $\pm$ 0.1   |
|              | WT    | 3.3 $\pm$ 1.5 | 4.2 $\pm$ 1.6  | 2.7 $\pm$ 1.6 | 2.1 $\pm$ 0.8 | 0.9 $\pm$ 0.4 | 1.2 $\pm$ 0.0 | 1.4 $\pm$ 0.9 | 1.7 $\pm$ 0.9  | 2.2 $\pm$ 1.2 |
|              | CV2   | 1.7 $\pm$ 1.0 | 1.7 $\pm$ 0.9  | 1.5 $\pm$ 1.2 | 1.3 $\pm$ 0.6 | 0.5 $\pm$ 0.2 | 1.6 $\pm$ 0.4 | 1.6 $\pm$ 1.2 | 1.0 $\pm$ 0.7  | 1.5 $\pm$ 0.7 |
| <i>il23a</i> | PBS   | 1 $\pm$ 0.6   | 1 $\pm$ 0.3    | 1 $\pm$ 0.5   | 1 $\pm$ 0.5   | 1 $\pm$ 0.5   | 1 $\pm$ 0.3   | 1 $\pm$ 0.4   | 1 $\pm$ 0.4    | 1 $\pm$ 0.5   |
|              | WT    | 1.3 $\pm$ 0.2 | 1.0 $\pm$ 0.1  | 0.9 $\pm$ 0.5 | 0.7 $\pm$ 0.4 | 0.9 $\pm$ 0.5 | 0.3 $\pm$ 0.0 | 1.0 $\pm$ 2.2 | 0.9 $\pm$ 1.2  | 1.0 $\pm$ 0.4 |
|              | CV2   | 1.1 $\pm$ 0.6 | 1.2 $\pm$ 0.5  | 0.5 $\pm$ 0.3 | 0.8 $\pm$ 0.6 | 1.0 $\pm$ 0.7 | 0.9 $\pm$ 0.6 | 0.7 $\pm$ 0.4 | 0.6 $\pm$ 0.3  | 1 $\pm$ 0.6   |

**Supplementary Table 3.** Description of different vectors used to obtain the different engineered strains.

| Vector name                                                       | Vector description                                                                      | Transformed strain               | Obtained strain name                            |
|-------------------------------------------------------------------|-----------------------------------------------------------------------------------------|----------------------------------|-------------------------------------------------|
| pMTnCmLox_Eftu_MPN142(OPT)_AI-II'                                 | Minitransposon vector used to obtain strains that express and secrete AI-II'            | WT and CV2                       | WT_A; CV2_A                                     |
| pMTnTclox_Eftu_MPN142(OPT)_PelAh_Flag                             | Minitransposon vector used to obtain strains that express and secrete PelAh             | WT and CV2                       | WT_PelAh;<br>CV2_PelAh                          |
| pMTnTclox_Eftu_MPN142(OPT)_PsiGh_Flag                             | Minitransposon vector used to obtain strains that express and secrete PsiGh             | WT and CV2                       | WT_PsiGh;<br>CV2_PsiGh                          |
| pMTnTclox_Eftu_MPN142(OPT)_PelAh_Flag_Eftu_MPN142(OPT)_PsiGh_Flag | Minitransposon vector used to obtain strains that express and secrete PelAh and PsiGh   | WT and CV2;<br>WT_A and<br>CV2_A | WT_H; CV2_H;<br>WT_HA; CV2_HA                   |
| pMTnGmLox_P3_MPN142(OPT2)_pyocin_L1                               | Minitransposon vector used to express and secrete of PyocinL1 without Flag              | WT; CV2<br>WT_HA and<br>CV2_HA   | WT_PL1; CV2_PL1;<br>WT_HA_PL1 and<br>CV2_HA_PL1 |
| pMTnGmLox_P3_MPN142(OPT2)_pyocin_S5                               | Vector to test secretion of PyocinS5 without Flag. Expression of gene under P3 promoter | WT                               | WT_PS5                                          |

**Supplementary Table 4.** Average values of areas under curve (AUC) for the three best peptides obtained by MS for the heterologous proteins identified in cells and supernatants (SPN) of different *M. pneumoniae* strains. (ND, Not Detected).

| Protein   | CV2_HA (Cells) | CV2_HA (SPN) | CV2_A1-II' (Cells) | CV2_A1-II' (SPN) | CV2_PelAh-PsiGh (Cells) | CV2_PelAh-PsiGh (SPN) | CV2_HA_P1 (Cells) | CV2_HA_P1 (SPN) |
|-----------|----------------|--------------|--------------------|------------------|-------------------------|-----------------------|-------------------|-----------------|
| AI-II'    | 8,27E+07       | 9,87E+07     | 5,87E+07           | 3,83E+07         | ND                      | ND                    | 6,97E+07          | 2,17E+08        |
| PelAh     | 1,43E+08       | 2,40E+07     | ND                 | ND               | 1,43E+08                | 8,53E+07              | 1,40E+08          | 6,30E+07        |
| PsiGh     | 8,87E+08       | 4,10E+07     | ND                 | ND               | 8,27E+08                | 9,97E+07              | 9,00E+08          | 6,40E+07        |
| Pyocin-L1 | ND             | ND           | ND                 | ND               | ND                      | ND                    | 7,27E+08          | 7,85E+07        |

**Supplementary Table 5.** Histopathologic evaluation of the lung lobes (left, right cranial and right medium) of mice inoculated with  $1 \times 10^8$  CFU of the WT or CV2\_HA\_P1 *M. pneumoniae* strains or with PBS at 2-, 14- and 45 days post-infection (dpi). The indicated numbers represent the average and the SD of the evaluations from five mice per group. The scoring system is detailed in the Methods section.

| Time post-infection | Group     |      | Peribronchial/bronchial infiltrate (%) |     |     | Quality of peribronchial/bronchial infiltrates |     |     | Bronchiolar/bronchial luminal exudate |     |     | Perivascular infiltrate (%) |     |     | Parenchymal pneumonia |     |     | Total score (0-26) |      |      |
|---------------------|-----------|------|----------------------------------------|-----|-----|------------------------------------------------|-----|-----|---------------------------------------|-----|-----|-----------------------------|-----|-----|-----------------------|-----|-----|--------------------|------|------|
|                     |           |      | Left                                   | RCr | RM  | Left                                           | RCr | RM  | Left                                  | RCr | RM  | Left                        | RCr | RM  | Left                  | RCr | RM  | Left               | RCr  | RM   |
| 2 dpi               | PBS       | Mean | 0.0                                    | 0.0 | 0.0 | 0.0                                            | 0.0 | 0.0 | 0.0                                   | 0.0 | 0.0 | 0.2                         | 0.2 | 0.0 | 0.0                   | 0.0 | 0.0 | 0.2                | 0.2  | 0.0  |
|                     |           | SD   | 0.0                                    | 0.0 | 0.0 | 0.0                                            | 0.0 | 0.0 | 0.0                                   | 0.0 | 0.0 | 0.4                         | 0.4 | 0.0 | 0.0                   | 0.0 | 0.0 | 0.4                | 0.4  | 0.0  |
|                     | WT        | Mean | 1.4                                    | 1.6 | 1.4 | 1.4                                            | 1.6 | 1.4 | 2.0                                   | 1.8 | 1.2 | 2.0                         | 1.4 | 1.4 | 3.2                   | 2.8 | 1.6 | 16.8               | 16.0 | 12.2 |
|                     |           | SD   | 0.5                                    | 0.5 | 0.5 | 0.8                                            | 0.5 | 0.5 | 0.0                                   | 0.4 | 0.4 | 0.6                         | 0.5 | 0.5 | 1.8                   | 1.6 | 2.1 | 4.2                | 4.2  | 4.7  |
|                     | CV2_HA_P1 | Mean | 0.4                                    | 0.6 | 0.2 | 0.4                                            | 0.6 | 0.2 | 1.6                                   | 1.4 | 1.6 | 1.6                         | 1.8 | 2.0 | 0.6                   | 1.2 | 0.6 | 8.6                | 9.6  | 8.2  |
|                     |           | SD   | 0.5                                    | 0.5 | 0.4 | 0.5                                            | 0.5 | 0.4 | 0.5                                   | 0.5 | 0.5 | 0.8                         | 0.4 | 0.6 | 1.2                   | 1.5 | 1.2 | 3.2                | 1.6  | 4.2  |
| 14 dpi              | PBS       | Mean | 0.0                                    | 0.0 | 0.0 | 0.0                                            | 0.0 | 0.0 | 0.0                                   | 0.0 | 0.0 | 0.2                         | 0.2 | 0.0 | 0.0                   | 0.0 | 0.0 | 0.2                | 0.2  | 0.0  |
|                     |           | SD   | 0.0                                    | 0.0 | 0.0 | 0.0                                            | 0.0 | 0.0 | 0.0                                   | 0.0 | 0.0 | 0.4                         | 0.4 | 0.0 | 0.0                   | 0.0 | 0.0 | 0.4                | 0.4  | 0.0  |
|                     | WT        | Mean | 0.2                                    | 0.4 | 0.2 | 0.4                                            | 0.4 | 0.2 | 0.8                                   | 0.6 | 0.4 | 1.6                         | 2.0 | 1.6 | 1.2                   | 0.6 | 0.6 | 6.6                | 6.0  | 4.2  |
|                     |           | SD   | 0.4                                    | 0.5 | 0.4 | 0.8                                            | 0.5 | 0.4 | 0.4                                   | 0.5 | 0.5 | 0.5                         | 0.0 | 0.5 | 1.5                   | 1.2 | 1.2 | 1.7                | 2.7  | 2.8  |
|                     | CV2_HA_P1 | Mean | 0.0                                    | 0.0 | 0.0 | 0.0                                            | 0.0 | 0.0 | 0.0                                   | 0.0 | 0.0 | 1.4                         | 1.0 | 1.2 | 1.2                   | 0.6 | 0.6 | 2.6                | 1.6  | 1.8  |
|                     |           | SD   | 0.0                                    | 0.0 | 0.0 | 0.0                                            | 0.0 | 0.0 | 0.0                                   | 0.0 | 0.0 | 0.5                         | 0.6 | 0.4 | 1.5                   | 1.2 | 1.2 | 1.6                | 1.7  | 1.2  |
| 45 dpi              | PBS       | Mean | 0.0                                    | 0.0 | 0.0 | 0.0                                            | 0.0 | 0.0 | 0.0                                   | 0.0 | 0.0 | 0.2                         | 0.2 | 0.0 | 0.0                   | 0.0 | 0.0 | 0.2                | 0.2  | 0.0  |
|                     |           | SD   | 0.0                                    | 0.0 | 0.0 | 0.0                                            | 0.0 | 0.0 | 0.0                                   | 0.0 | 0.0 | 0.4                         | 0.4 | 0.0 | 0.0                   | 0.0 | 0.0 | 0.4                | 0.4  | 0.0  |
|                     | WT        | Mean | 0.0                                    | 0.0 | 0.0 | 0.0                                            | 0.0 | 0.0 | 0.0                                   | 0.0 | 0.0 | 1.0                         | 1.0 | 1.0 | 0.6                   | 1.2 | 0.6 | 1.6                | 2.2  | 1.6  |
|                     |           | SD   | 0.0                                    | 0.0 | 0.0 | 0.0                                            | 0.0 | 0.0 | 0.0                                   | 0.0 | 0.0 | 0.0                         | 0.9 | 0.0 | 1.2                   | 1.5 | 1.2 | 1.2                | 2.3  | 1.2  |
|                     | CV2_HA_P1 | Mean | 0.0                                    | 0.0 | 0.0 | 0.0                                            | 0.0 | 0.0 | 0.0                                   | 0.0 | 0.0 | 0.2                         | 0.2 | 0.2 | 0.0                   | 0.0 | 0.0 | 0.2                | 0.2  | 0.2  |
|                     |           | SD   | 0.0                                    | 0.0 | 0.0 | 0.0                                            | 0.0 | 0.0 | 0.0                                   | 0.0 | 0.0 | 0.4                         | 0.4 | 0.4 | 0.0                   | 0.0 | 0.0 | 0.4                | 0.4  | 0.4  |

**Supplementary Table 6.** Gene expression of cytokines analyzed in lungs of mice inoculated with  $1 \times 10^8$  CFU of WT or CV2\_HA\_P1 *M. pneumoniae* or with PBS. Analysis was performed on the left lung and values are presented as mean  $\pm$  SD (n = 5 mice per group).

| Gene         | Group     | 2 dpi             | 14 dpi         |
|--------------|-----------|-------------------|----------------|
| <i>tnf</i>   | PBS       | 1.0 $\pm$ 0.5     | 1.0 $\pm$ 0.5  |
|              | WT        | 18.0 $\pm$ 1.8    | 3.0 $\pm$ 0.7  |
|              | CV2_HA_P1 | 5.1 $\pm$ 2.2     | 9.5 $\pm$ 3.5  |
| <i>cxcl1</i> | PBS       | 1.0 $\pm$ 0.5     | 1.0 $\pm$ 0.5  |
|              | WT        | 715.4 $\pm$ 246.0 | 3.4 $\pm$ 1.5  |
|              | CV2_HA_P1 | 343.3 $\pm$ 281.9 | 1.25 $\pm$ 0.3 |
| <i>ccl3</i>  | PBS       | 1.0 $\pm$ 0.67    | 9.4 $\pm$ 3.5  |
|              | WT        | 85.4 $\pm$ 62.9   | 3.0 $\pm$ 0.7  |
|              | CV2_HA_P1 | 31.6 $\pm$ 32.6   | 1.0 $\pm$ 0.5  |
| <i>ccl2</i>  | PBS       | 1.0 $\pm$ 0.5     | 1.0 $\pm$ 0.5  |
|              | WT        | 145.4 $\pm$ 18.4  | 3.4 $\pm$ 1.5  |
|              | CV2_HA_P1 | 115.2 $\pm$ 42.0  | 1.3 $\pm$ 0.3  |
| <i>ifng</i>  | PBS       | 1.0 $\pm$ 0.3     | 1.0 $\pm$ 0.8  |
|              | WT        | 55.8 $\pm$ 7.0    | 0.9 $\pm$ 0.2  |
|              | CV2_HA_P1 | 26.6 $\pm$ 17.7   | 0.7 $\pm$ 0.1  |
| <i>il1b</i>  | PBS       | 1.0 $\pm$ 0.44    | 1.0 $\pm$ 0.4  |
|              | WT        | 40.3 $\pm$ 1.9    | 2.9 $\pm$ 1.0  |
|              | CV2_HA_P1 | 12.5 $\pm$ 1.4    | 1.7 $\pm$ 0.9  |
| <i>il6</i>   | PBS       | 1.0 $\pm$ 0.5     | 1.0 $\pm$ 0.9  |
|              | WT        | 65.9 $\pm$ 18.9   | 0.5 $\pm$ 0.1  |
|              | CV2_HA_P1 | 26.4 $\pm$ 22.7   | 0.4 $\pm$ 0.1  |
| <i>il12a</i> | PBS       | 1.0 $\pm$ 0.5     | 1.0 $\pm$ 0.7  |
|              | WT        | 3.1 $\pm$ 0.9     | 1.5 $\pm$ 0.5  |
|              | CV2_HA_P1 | 2.1 $\pm$ 0.9     | 1.2 $\pm$ 0.4  |
| <i>il23a</i> | PBS       | 1.0 $\pm$ 0.5     | 1.0 $\pm$ 0.5  |
|              | WT        | 13.4 $\pm$ 2.9    | 2.1 $\pm$ 0.3  |
|              | CV2_HA_P1 | 5.7 $\pm$ 0.9     | 1.4 $\pm$ 0.2  |

**Supplementary Table 7.** Oligonucleotides used in the qPCR to analyze the inflammation markers in lungs.

| Gene         | Forward (F)/reverse (R) | Sequence (5'-3')       |
|--------------|-------------------------|------------------------|
| <i>gapdH</i> | F                       | CCCACTAACATCAAATGGGG   |
|              | R                       | CCTTCCACAATGCCAAAGTT   |
| <i>tnf</i>   | F                       | AGGCACTCCCCAAAAGA      |
|              | R                       | GCTCCTCCAATTGGTGGTTT   |
| <i>cxcl1</i> | F                       | GACAG ACTGCTCTGATGGCA  |
|              | R                       | TGCACTT CTTTTCGCACAAAC |
| <i>ccl3</i>  | F                       | CCCAGCCAGGTGTCATTTTCC  |
|              | R                       | GCATTCAGTTCCAGGTCAGTG  |
| <i>ccl2</i>  | F                       | CTTCTGGGCCTGCTGTTCA    |
|              | R                       | CCAGCCTACTCATTGGGATCA  |
| <i>ifn</i>   | F                       | CTGGCAAAGGATGGTGAC     |
|              | R                       | GCTGATGGCCTGATTGTCTT   |
| <i>il1b</i>  | F                       | GCTGCTTCCAAACCTTTGAC   |
|              | R                       | AGCTTCTCCACAGCCACAAT   |
| <i>il6</i>   | F                       | TGATGCACTTGCAGAAAACA   |
|              | R                       | GGTCTTGGTCCTTAGCCACTC  |
| <i>il12a</i> | F                       | CAGCACCAGCTTCTTCATCAG  |
|              | R                       | TCTTCAAAGGCTTCATCTGCAA |
| <i>il23a</i> | F                       | TGCTGGATTGCAGAGCAGTAA  |
|              | R                       | GCATGCAGAGATTCCGAGAGA  |
